# Supplementary material for: Assessing Trans-Inhibition of OATP1B1 and OATP1B3 by Calcineurin and/or PPIase Inhibitors and Global Identification of OATP1B1/3-Associated Proteins
Source: MDPI journal article supplement (doi:10.3390/pharmaceutics16010063), 2023-12-31
Supplement: s1 [file s1]

Supplemental Files

Assessing Trans-Inhibition of OATP1B1 and OATP1B3 by Calcineurin and/or PPIase Inhibitors and Global Identification of OATP1B1/3-Associated Proteins

John T. Powell, Ruhul Kayesh, Alexandra Ballesteros-Perez, Khondoker Alam, Pascaline Niyonshuti, Erik J. Soderblom, Kai Ding, Chao Xu, Wei Yue

Table S1. Demographics of human hepatocytes donors

| Donors    | Age<br>(years) | Gender | Race      | BMI  | Smoking | Alcohol use   |
|-----------|----------------|--------|-----------|------|---------|---------------|
| HUM181621 | 23             | F      | Caucasian | 31.3 | No      | once per year |

F, female; M, male; BMI, body mass index

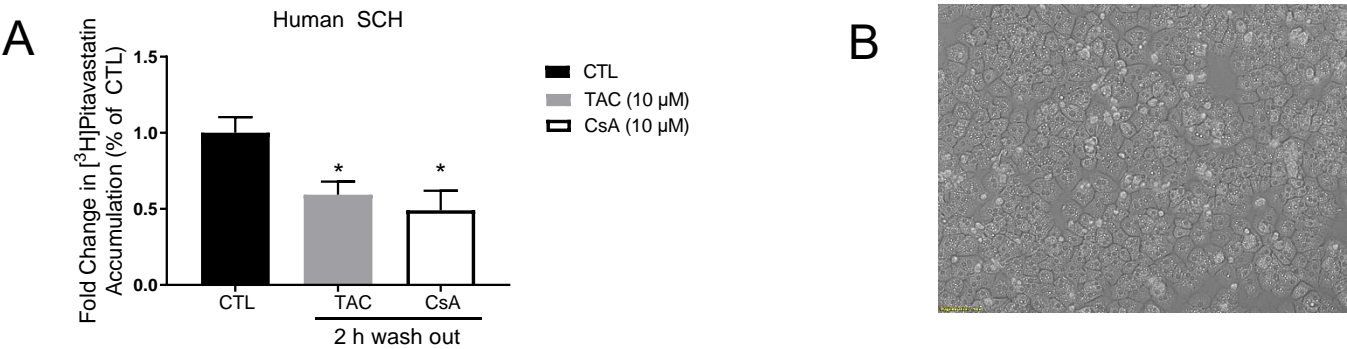

**Figure S1** Long-lasting pitavastatin uptake in human SCH following tacrolimus and CsA treatment. Human SCH were pretreated with CsA or tacrolimus (each 10 μM for 1 h). After washing, cells were cultured in inhibitor-free culture medium, [<sup>3</sup>H]-pitavastatin accumulation (1 μM, 30 sec) was determined at 3 h after wash out phase in the drug-free medium. Data represent mean ± SD in triplicate. \* p<0.05 by one way ANOVA vs. CTL. (B) Representative light images of human SCH on the day of experiment (10X).

**Table S2. Calcineurin- and mTOR-relevant proteins associated with OATP1B1 and OATP1B3.**

| <b>Identified Proteins</b>               | <b>Accession Number</b> | <b>Alternative Name</b> | <b>OATP 1B1</b> | <b>OATP 1B3</b> |
|------------------------------------------|-------------------------|-------------------------|-----------------|-----------------|
| <b>Calcineurin substrates</b>            |                         |                         |                 |                 |
| Cell division cycle protein 20 homolog   | CDC20_HUMAN             | CDC20                   | +               | +               |
| Caveolin-1                               | CAV1_HUMAN              | CAV1                    | ++              | ++              |
| <b>mTOR-relevant proteins</b>            |                         |                         |                 |                 |
| Receptor of activated protein C kinase 1 | RACK1_HUMAN             | RACK1                   | ++              | ++              |
| Regulatory-associated protein of mTOR    | RPTOR_HUMAN             | RPTOR                   | ++              | -               |
| TELO2-interacting protein 1              | TTI1_HUMAN              | TTI1                    | ++              | +               |
| Ragulator complex protein LAMTOR1        | LTOR1_HUMAN             | LAMTOR1                 | ++              | ++              |

"-": total spectrum count of 0; "+": total spectrum count (0-3); "++": total spectrum count  $\geq 3$   
Total spectrum counts are 0 in Mock for all entries in Table S1.
